# Supplementary material for: Dot-base62x: building a compact and user-friendly text representation scheme of ipv6 addresses for cloud computing
Source: Springer Nature journal article supplement (doi:10.1186/2192-113x-1-3), 2012-01-01

RIR IPv4 Address Run-Down Model

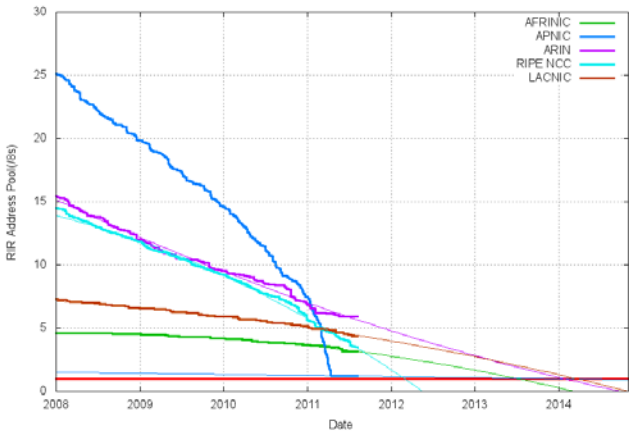

Supplement: 13677_2011_14_MOESM1_ESM.pdf [file 13677_2011_14_MOESM1_ESM.pdf]
