# Supplementary material for: Dot-base62x: building a compact and user-friendly text representation scheme of ipv6 addresses for cloud computing
Source: Springer Nature journal article supplement (doi:10.1186/2192-113x-1-3), 2012-01-01
Supplement: 13677_2011_14_MOESM4_ESM.pdf [file 13677_2011_14_MOESM4_ESM.pdf]

# IPv6 Addressing

128 bit address

0011 1111 1111 1110 1000 0000 1111 0000  
0000 0000 0000 0010 0000 0000 0000 0000  
0000 0000 0000 0000 0000 0000 0001 0000  
0000 0000 0000 0000 0000 0000 0000 0000

Represented in Hex (every 4 bits)

3FFE:80F0:0002:0000:0000:0010:0000:0000
