# Supplementary material for: Dot-base62x: building a compact and user-friendly text representation scheme of ipv6 addresses for cloud computing
Source: Springer Nature journal article supplement (doi:10.1186/2192-113x-1-3), 2012-01-01
Supplement: 13677_2011_14_MOESM6_ESM.pdf [file 13677_2011_14_MOESM6_ESM.pdf]

(colon hexadecimal notation)

2001:0DB8:0000:2F3B:02AA:00FF:FE28:9C5A (39 bytes)

2 0 0 1 0 D B 8 0 0 0 0 2 F 3 B 0 2 A A 0 0 F F F E 2 8 9 C 5 A

001000000000000100001101101110000000000000000000010111100111011000001010101010000000011111111111110001010001001110001011010  
001000 16 bits 24 bits 011010

8 0 4 D k 0 0 0 2 z y 0 g e 1 x 3 x 3 u e 9 n Q

804D.k000.2zy.0ge1.x3x3ue.9nQ (29 bytes)

(dot-base62x notation)
