# Supplementary material for: Dot-base62x: building a compact and user-friendly text representation scheme of ipv6 addresses for cloud computing
Source: Springer Nature journal article supplement (doi:10.1186/2192-113x-1-3), 2012-01-01
Supplement: 13677_2011_14_MOESM10_ESM.pdf [file 13677_2011_14_MOESM10_ESM.pdf]

IPv6 address in dot-base62x

804D.k000.2zy.0ge0.x3x3ue.9nQ

global routing

local routing

?

192.168.100.101

IPv4 local routing

209.85.227.103

IPv4 global routing
